# Supplementary material for: Wahrgenommene Wertschätzung im Lehramtsstudium
Source: Atypon-hosted journal article supplement (doi:10.1024/1010-0652/a000337), 2021-12-03
Supplement: 1010-0652_a000337_esm1.pdf [file 1010-0652_a000337_esm1.pdf]

## Elektronisches Supplement

**Tabelle E1.** Selektivitätsanalysen zwischen der Ausgangsstichprobe und den im Längsschnitt betrachteten Personen

| Variable                  | Längsschnitt<br>( <i>n</i> = 436) | Basisstichprobe<br>( <i>N</i> = 1,255) | Statistische Vergleiche |          |                |
|---------------------------|-----------------------------------|----------------------------------------|-------------------------|----------|----------------|
|                           | <i>M</i> ( <i>SD</i> )            | <i>M</i> ( <i>SD</i> )                 | Teststatistik           | <i>p</i> | <i>ES</i>      |
| Abiturnote                | 2.20 (0.52)                       | 2.32 (0.53)                            | F(1,1241) = 13,311      | <.001    | $\eta^2 = .01$ |
| Alter                     | 23.33 (2.97)                      | 23.40 (3.61)                           | F(1,1254) = 20.885      | <.001    | $\eta^2 = .02$ |
|                           | %                                 | %                                      |                         |          |                |
| Geschlecht<br>(weiblich)  | 73.2                              | 67.3                                   | $\chi^2(1) = 10.339$    | .001     | <i>V</i> = .09 |
| MINT-Fach<br>(mind. 1)    | 41.7                              | 42.1                                   | $\chi^2(1) < 1$         | .904     | <i>V</i> < .01 |
| Studienstatus<br>(Master) | 38.1                              | 26.1                                   | $\chi^2(1) = 50.081$    | <.001    | <i>V</i> = .20 |

*Anmerkungen.* *V* = Cramer's *V*: .10 = klein, .30 = mittel, .50 = groß.

**Tabelle E2.** Verwendete Skalen mit zugehörigen Items

---

### ***Fachspezifische Angaben***

#### *Wahrgenommene Wertschätzung*

In den fachwissenschaftlichen Lehrveranstaltungen in meinem Hauptfach X...

- (1) ...werden Lehramtsstudierende von den Lehrenden nach meiner Wahrnehmung und Erfahrung ebenso wertgeschätzt wie Fachstudierende.
- (2) ...gelten Lehramtsstudierende unter den Lehrenden als geringer kompetent als Fachstudierende.
- (3) ...erhalten Fachstudierende für ihre Leistung mehr Anerkennung von den Lehrenden als Lehramtsstudierende.
- (4) ...geben mir die Lehrenden zu verstehen, dass sie mich für kompetent halten.
- (5) ...zeigen mir die Lehrenden, dass sie mich für einen leistungsfähigen Studierenden halten.

#### *Fachenthusiasmus*

Wie beurteilen Sie folgende Aussagen in Bezug auf Ihr Hauptfach X?

- (1) Dieses Fach ist mir persönlich wichtig.
- (2) Ich bin von diesem Fach begeistert.
- (3) Ich finde dieses Fach spannend.

#### *Lehrveranstaltungszufriedenheit*

Wie beurteilen Sie die folgenden Aussagen in Bezug auf die fachwissenschaftlichen Lehrveranstaltungen in Ihrem Hauptfach X?

- (1) Meistens gehe ich gerne zu den fachwissenschaftlichen Lehrveranstaltungen in diesem Fach.
- (2) Ich werde den Großteil der fachwissenschaftlichen Lehrveranstaltungen in diesem Fach in guter Erinnerung behalten.
- (3) Insgesamt bin ich mit den fachwissenschaftlichen Lehrveranstaltungen in diesem Fach zufrieden.
- (4) Ich lerne in den fachwissenschaftlichen Lehrveranstaltungen in diesem Fach viel dazu.

### ***Allgemeine Angaben***

#### *Studienzufriedenheit*

Die nachfolgenden Aussagen beziehen sich auf Ihr Studium. Wie beurteilen Sie die folgenden Aussagen?

- (1) Insgesamt bin ich mit meinem jetzigen Studium zufrieden.
- (2) Ich finde mein Studium wirklich interessant.
- (3) Ich habe richtig Freude an dem, was ich studiere.

#### *Emotionale Erschöpfung*

Die folgenden Aussagen beziehen sich auf Ihr Studium. Wie beurteilen Sie die folgenden Aussagen?

- (1) Ich fühle mich von meinem Studium oft erschöpft.
- (2) Ich fühle mich von meinem Studium insgesamt überlastet.
- (3) Ich merke öfter im Studium, wie lustlos ich bin.
- (4) Manchmal bin ich am Ende eines Unitages richtig deprimiert.

#### *Studienabbruchsinention*

Die nachfolgenden Aussagen beziehen sich auf Ihr Studium. Wie beurteilen Sie die folgenden Aussagen?

- (1) Ich habe schon öfter daran gedacht, das Lehramtsstudium abzugeben.
- (2) Ich denke ernsthaft daran, das Lehramtsstudium ganz aufzugeben.
- (3) Wenn ich nochmals wählen könnte, würde ich mich für ein anderes Studium entscheiden.

---

*Anmerkungen.* Alle Einschätzungen wurden auf 4-stufigen Likert-Skalen (1 = *trifft überhaupt nicht zu*, 4 = *trifft völlig zu*) vorgenommen.

**Tabelle E3.** Verteilung der Lehramtsstudierenden auf die lehramtsbildenden Fächer sowie die relativen Anteile der Lehramtsstudierenden in Bezug auf die Gesamtzahl Studierender im jeweiligen Fach

| Fach                            | <i>N</i> <sup>a</sup> |            | Relativer Anteil<br>Lehramtsstudierender <sup>b</sup> |        |
|---------------------------------|-----------------------|------------|-------------------------------------------------------|--------|
|                                 | Bachelor              | Master     | Bachelor                                              | Master |
| Anglistik/Nordamerikanistik     | 210                   | 99         | 0.70                                                  | 0.83   |
| Biologie <sup>c</sup>           | 121                   | 43         | 0.48                                                  | 0.58   |
| Chemie <sup>c</sup>             | 72                    | 15         | 0.45                                                  | 0.28   |
| Dänisch                         | 20                    | 3          | 1.00                                                  | 1.00   |
| Deutsch                         | 331                   | 126        | 0.65                                                  | 0.69   |
| Evangelische Religionslehre     | 55                    | 30         | 0.44                                                  | 0.78   |
| Französische Philologie         | 36                    | 29         | 0.79                                                  | 0.99   |
| Geographie <sup>c</sup>         | 139                   | 37         | 0.50                                                  | 0.93   |
| Geschichte                      | 215                   | 52         | 0.65                                                  | 0.67   |
| Griechische Philologie          | 1                     | 1          | 0.30                                                  | 0.89   |
| Informatik <sup>c</sup>         | 29                    | 6          | 0.15                                                  | 0.09   |
| Kunst                           | 18                    | 13         | 0.24                                                  | 0.40   |
| Lateinische Philologie          | 49                    | 21         | 0.91                                                  | 1.00   |
| Mathematik <sup>c</sup>         | 147                   | 33         | 0.63                                                  | 0.64   |
| Philosophie                     | 134                   | 40         | 0.52                                                  | 0.63   |
| Physik <sup>c</sup>             | 58                    | 9          | 0.31                                                  | 0.29   |
| Slawische Philologie (Russisch) | 7                     | 2          | 0.36                                                  | 1.00   |
| Spanische Philologie            | 52                    | 32         | 0.78                                                  | 0.99   |
| Sportwissenschaft               | 71                    | 29         | 0.71                                                  | 0.62   |
| Wirtschaft/Politik              | 90                    | 33         | 0.36                                                  | 0.43   |
| Italienisch                     | 1                     | 1          | 0.41                                                  | 1.00   |
| <b>Gesamt</b>                   | <b>1856</b>           | <b>654</b> |                                                       |        |

*Anmerkungen.* <sup>a</sup> Anzahl Studierender in den Fächern, unabhängig von Erst- oder Zweitfach – jede Studentin bzw. jeder Student geht mit zwei Angaben (1. und 2. Hauptfach) in diese Statistik ein. <sup>b</sup> Diese Statistik wurde auf Basis der Immatrikulationsdaten für das Wintersemester 2017/18 erstellt. <sup>c</sup> MINT-Fach.
